# Supplementary material
Source: MDPI journal article supplement (https://www.mdpi.com/2073-4468/4/1/34)
Supplement: s1 [file s1]

## Supplementary Materials

### Induction of TNFR2 with IL2 on Tregs

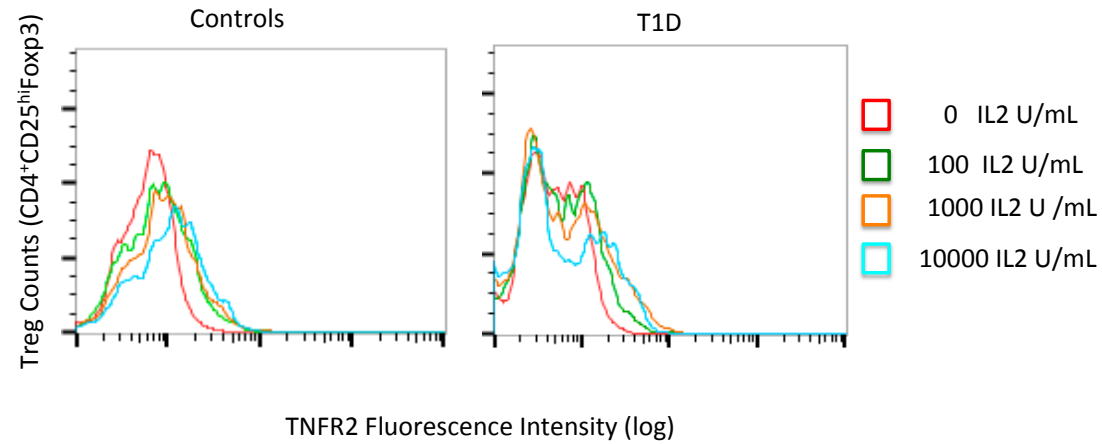

**Figure S1.** Induction of TNFR2 expressing Tregs, a dose-response of IL2 on a control (left) compared to type 1 diabetic (right).
